# Supplementary material
Source: PubMed Central journal article supplement (PMC10099158)
Supplement: jamacardiol-e230494-s002.pdf [file jamacardiol-e230494-s002.pdf]

## Data Sharing Statement

Thavendiranathan. Comprehensive Cardiovascular Magnetic Resonance Tissue Characterization and Cardiotoxicity in Women With Breast Cancer. *JAMA Cardiol.* Published April 12, 2023. doi:10.1001/jamacardio.2023.0494

### Data

**Data available:** No

### Additional Information

**Explanation for why data not available:** Data can be made available upon reasonable request
